# Supplementary material
Source: Elsevier journal article supplement (https://www.sciencedirect.com/science/article/pii/S0212656709002522)
Supplement: mmc1 [file S0212656709002522:mmc1.doc]

Ítems categóricos de la prueba (excluidas maniquí): Fiabilidad intra evaluador (test-retest), entre evaluadores y concordancia entre filmaciones.

| Orden de los ítem  según recomendaciones | | **Respecto al Cardiff** | **ÍTEMS CATEGÓRICOS** | Test-retest  (intraevaluador) | | | **Entre**  **evaluadores** | | | **Entre**  **filmaciones** | | |
| --- | --- | --- | --- | --- | --- | --- | --- | --- | --- | --- | --- | --- |
| **2000** | **12/2005** | K IC | | | K IC | | | **K IC** | | |
| **A 1.1** | **A 1.1** | **≠** | ***Preguntar hora de colapso*** | | **0,948** | **0,847-1,000** | | **0,902** | **0,786-1,000** | | **0,744** | **0,551-0,937** |
| **A 1.2** | **A 1.2** | **≈** | ***Aproximación segura*** | | **0.657** | **0,480-0874** | | **0,580** | **0,047-0,830** | | **0,751** | **0,525-0,908** |
| **R 2.1** | **R 2.1** | **=** | ***Valoración conciencia (gritar)*** | | **0,844** | **0,670-1,000** | | **0,915** | **0,016-1,000** | | **0,856** | **0,697-1,000** |
| **R 2.2** | **R 2.2** | **≈** | ***Valoración conciencia (sacudir)*** | | **0,725** | **0,680-0,855** | | **0,409** | **0,148-0,620** | | **0,680** | **0,556-0,766** |
| **G 2.3** | **D 2.3** | **=** | ***Gritar pidiendo ayuda*** | | **0,867** | **0,779-0,956** | | **0,679** | **0,556-0,826** | | **0,848** | **0,752-0,943** |
| **O 3.1** | **O 3.1** | **≈** | ***OVA (comprobación inicial respiración)*** | | **0,722** | **0,569-0,818** | | **0,530** | **0,384-0,681** | | **0,691** | **0,584-0,808** |
| **O 6.1** |  | **≈** | **OVA (comprobación inicial circulación)** | | **0,584** | **0,424-0,717** | | **0,458** | **0,271-0,779** | | **0,679** | **0,577-0,816** |
| **O 17.1** |  | **≈** | **OVA (comprobar circulación tras descarga 3)** | | **0,646** | **0,476-0,628** | | **0,571** | **0,358-0,726** | | **0,694** | **0,528-0,826** |
| **O 27.1** |  | **≠** | **OVA(comprobar retorno circulación / pulso)** | | **0,563** | **0,396-0,639** | | **0,416** | **0,220-0,591** | | **0,450** | **0,209-0,646** |
| **I 3.2** | **I 15.1** | **≈** | ***Inspección cavidad bucal*** | | **0,674** | **0,493-0,828** | | **0,524** | **0,284-0,778** | | **0,695** | **0,311-0,847** |
| **C 3.3** | **C 3.2** | **≈** | ***Comprobación inicial respiración*** | | **0,670** | **0,571-0,766** | | **0,552** | **0,371-0,726** | | **0,645** | **0,539-0,765** |
| **T 4.1** | **T 4.1** | **≠** | ***Momento aviso / llamada 112*** | | **0,758** | **0,628-0,887** | | **0,709** | **0,575-0,828** | | **0,813** | **0,000-0,100** |
| **T 4.2** | **T 4.2** | **≈** | ***Información en el aviso al 112*** | | **0,692** | **0,543-0,842** | | **0,660** | **0,472-0,836** | | **0,788** | **0,655-0,920** |
| **G 5.2** | **G 5.2** | **≠** | **Selección Cánula Güedel** | | **0,836** | **0,736-0,919** | | **0,687** | **0,518-0,842** | | **0,765** | **0,655-0,848** |
| **G 5.3** | **G 5.3** | **≠** | **Colocación Güedel** | | **0,892** | **0,821-0,969** | | **0,889** | **0,775-0,977** | | **0,799** | **0,683-0,891** |
| **X 5.4** | **X 15.2** | **≠** | **Administración oxígeno** | | **0,835** | **0,752-0,925** | | **0,782** | **0,656-0,932** | | **0,860** | **0,777-0,917** |
| **V 5.6** |  | **≈** | **2 Ventilaciones iniciales de rescate** | | **0,715** | **0,629-0,825** | | **0,619** | **0,502-0,749** | | **0,698** | **0,577-0,816** |
| **P 6.2** |  | **≈** | **Comprobación inicial circulación** | | **0,544** | **0,403-0,636** | | **0,403** | **0,191-0,616** | | **0,537** | **0,413-0,640** |
| **P 6.3** |  | **≈** | **Comprobar circulación tras 2 ventil. iniciales** | | **0,832** | **0,737-0,908** | | **0,677** | **0,569-0,806** | | **0,855** | **0,768-0,921** |
| **P 17.2** |  | **≈** | **Comprobar circulación tras descarga 3** | | **0,564** | **0,366-0,727** | | **0,377** | **0,198-0,565** | | **0,560** | **0,362-0,681** |
| **P 27.2.1** |  | **≈** | **Comprobar circulación tras descarga 4** | | **0,554** | **0,426-0,671** | | **0,330** | **0,048-0,503** | | **0,474** | **0,307-0,595** |
| **E 7.1*** | **E 6.1 *** | **=** | ***Encender DEA**** | | **-0,012** | **-0,03-0,013** | | **-0,03** | **-0,07-0,047** | | **-0,012** | **-0,037-0,013-** |
| **E 7.2** | **E 6.2** | **=** | ***Colocación electrodos*** | | **0,467** | **0,268-0,560** | | **0,321** | **0,181-0,419** | | **0,471** | **0,333-0,561** |
| **E 7.3** | **E 6.3** | **≠** | ***Fijación electrodos*** | | **0,905** | **0,720-1,000** | | **0,850** | **0,022-1,000** | | **0,715** | **0,407-1,000** |
| **S 8.1** | **S7.1** | **≈** | ***Interferencia en análisis DEA (pre descarga 1)*** | | **0,847** | **0,647-0,946** | | **0,847** | **0,742-1,000** | | **0,852** | **0,708-0,946** |
| **S 9.1** | **S 8.1** | **≈** | ***Comprobación visual “no tocar” 1er análisis*** | | **0,647** | **0,433-0,769** | | **0,534** | **0,195-0,749** | | **0,610** | **0,447-0,755** |
| **S 9.2** | **S 8.2** | **≈** | ***Comprobación verbal “no tocar” 1er análisis*** | | **0,690** | **0,498-0,826** | | **0,535** | **0,329-0,756** | | **0,731** | **0,582-0,832** |
| **S 10.1** | **S 9.1** | **≈** | ***Seguridad 1era descarga (control visual)*** | | **0,608** | **0,409-0,736** | | **0,371** | **0,192-0,593** | | **0,407** | **0,253-0,579** |
| **S 10.2** | **S 9.2** | **≈** | ***Seguridad 1era descarga (control verbal)*** | | **0,718** | **0,587-0,811** | | **0,676** | **0,529-0,847** | | **0,741** | **0,635-0,882** |
| **S 12.1** | **S 18.1** | **≈** | ***Comprobación visual “no tocar” 2º análisis*** | | **0,594** | **0,443-0,733** | | **0,500** | **0,334-0,677** | | **0,472** | **0,290-0,653** |
| **S 12.2** | **S 18.2** | **≠** | ***Comprobación verbal “no tocar” 2º análisis*** | | **0,951** | **0,882-1,000** | | **0,750** | **0,502-0,921** | | **0,854** | **0,741-0,968** |
| **S 13.1** | **S 19.1** | **≠** | ***Seguridad 2º descarga (control visual)*** | | **0,669** | **0,478-0,873** | | **0,457** | **0,248-0,640** | | **0,502** | **0,317-0,683** |
| **S 13.2** | **S 19.2** | **≠** | ***Seguridad 2º descarga (control verbal)*** | | **0,764** | **0,658-0,870** | | **0,816** | **0,627-0,943** | | **0,863** | **0,737-0,932** |
| **S 14.1** |  | **≈** | **Comprobación visual “no tocar” 3er análisis** | | **0,430** | **0,273-0,641** | | **0,260** | **0,079-0,469** | | **0,454** | **0,205-0,238** |
| **S 14.2** |  | **≈** | **Comprobación verbal “no tocar” 3er análisis** | | **0,735** | **0,591-0,878** | | **0,686** | **0,369-0,894** | | **0,741** | **0,596-0,885** |
| **S 15.1** |  | **≈** | **Interferencia en análisis DEA (pre descarga 3)** | | **0,695** | **0,395-0,818** | | **0,580** | **0,019-0,790** | | **0,705** | **0,452-0,846** |
| **S 16.1** |  | **≈** | **Seguridad 3ª descarga (control visual)** | | **0,565** | **0,426-0,731** | | **0,507** | **0,255-0,660** | | **0,493** | **0,377-0,686** |
| **S 16.2** |  | **≈** | **Seguridad 3ª descarga (control verbal)** | | **0,827** | **0,722-0,932** | | **0,571** | **0,358-0,726** | | **0,700** | **0,569-0,832** |
| **S 25.1** |  | **≈** | **Comprobación visual “no tocar” 4º análisis** | | **0,794** | **0,642-0,932** | | **0,351** | **0,01-0,667** | | **0,512** | **0,199-0,661** |
| **S 25.2** |  | **≈** | **Comprobación verbal “no tocar” 4º análisis** | | **0,779** | **0,546-0,889** | | **0,565** | **0,049-0,864** | | **0,830** | **0,597-0,961** |
| **S 26.1** |  | **≈** | **Seguridad 4ª descarga (control visual)** | | **0,645** | **0,485-0,786** | | **0,328** | **0,108-0,457** | | **0,617** | **0,424-0,762** |
| **S 26.2** |  | **≈** | **Seguridad 4ª descarga (control verbal)** | | **0,857** | **0,760-0,955** | | **0,873** | **0,678-0,972** | | **0,893** | **0,809-0,976** |
| **RC 19.4** | **RC16.4** | **≠** | ***2 ventilaciones efectivas (1ª serie de 1’ RCP)*** | | **0,639** | **0,514-0,756** | | **0,489** | **0,316-0,644** | | **0,583** | **0,465-0,720** |
| **RC 21.1** | **RC12.1** | **≈** | ***Buscar zona de compresión*** | | **0,745** | **0,622-0,836** | | **0,630** | **0,493-0,777** | | **0,746** | **0,659-0,853** |
| **RC 22.1** | **RC17.1** | **≈** | ***Ritmo de compresiones /ventilaciones*** | | **0,715** | **0,409-1,000** | | **0,687** | **0,561-0,791** | | **0,548** | **-0,06-1,000** |
| **RC 23.3** | **RC13.1** | **≠** | ***Frecuencia compresiones percibida*** | | **0,723** | **0,620-0,825** | | **0,470** | **0,370-0,617** | | **0,710** | **0,599-0,821** |
| **RC 24.3** | **RC14.1** | **≠** | ***Profundidad compresiones percibida*** | | **0,641** | **0,431-0,779** | | **0,479** | **0,318-0,682** | | **0,611** | **0,411-0,746** |
| **L 28** | **L 23.1** | **≠** | ***Giro lateral cabeza / posición lateral seguridad*** | | **0,950** | **0,894-1,000** | | **0,945** | **0,860-1,000** | | **0,983** | **0,950-1,000** |
| **F 29.1** | **F 24.1** | **≠** | ***Información llegada 112 : suceso*** | | **0,499** | **0,270-0,729** | | **0,431** | **0,034-0,721** | | **0,474** | **0,210-0,738** |
| **F 29.2** | **F 24.2** | **≠** | ***Información llegada 112 : tiempo de parada*** | | **0,683** | **0,546-0,820** | | **0,421** | **0,313-0,595** | | **0,370** | **0, 201-0,539** |
| **F 29.3** | **F 24.3** | **≠** | ***Información llegada 112 : inicio RCP*** | | **0,712** | **0,586-0,838** | | **0,664** | **0,459-0,868** | | **0,622** | **0,486-0,758** |
| **F 29.4** | **F 24.4** | **≠** | ***Información llegada 112 : desfibrilación*** | | **0,760** | **0,637-0,883** | | **0,588** | **0,258-0,852** | | **0,657** | **0,524-0,791** |
| **K 30.1** | **K 25.1** | **≈** | **Orden en la secuencia** | | **0,532** | **0,385-0,635** | | **0,195** | **0,103-0,274** | | **0,511** | **0,340-0,595** |
| **K 30.2** | **K 25.2** | **≠** | **Control de la situación** | | **0,562** | **0,444-0,682** | | **0,259** | **0,125-0,363** | | **0,538** | **0,435-0,659** |
| **K 30.3** | **K 25.3** |  | **Si desorden : especificar *…………. no procede cálculo*** | | | | | | | | | |

-En rojoy cursiva: Test con ítems y orden según recomendaciones 12/2005. Puntuaciones bajas :se destacan ensombrecidas en la tabla.

**-La letra mayúscula** que acompaña el nº de íetm codifica **Dimensión o habilidad** (agrupación homogénea de actuaciones): **A: aproximación segura; R: respuesta (conciencia); G : gritar ayuda; O: obertura vía aérea; I : inspección cavidad bucal ; C: comprobación inicial respiración; T: Alertar a 112; G : cánula de Güedel; E : electrodos y DEA; S : shoc o descarga ; RC : reanimación cardiopulmonar; V : ventilaciones; X : administración de oxígeno; P : comprobación de circulación (retorno); L : posición lateral de seguridad; F : información a llegada 112. orden y control. K: Control y orden**

**-OVA** : Obertura vía aérea**; ≠ (diferente o nuevo) ; ≈ (modificado) ; = (igual)**

**CCI : Coeficiente de correlación intraclase; K: Kappa ; IC : intervalo de confianza. *sesgo de prevalencia**

**La letra** que acompaña el nº de íetm codifica **Dimensión o habilidad** (agrupación homogénea de actuaciones o ítems ) : **A: aproximación segura;**

**R: respuesta (valorar conciencia); G : gritar ayuda; O: obertura vía aérea; C: comprobación inicial respiración; T Alertar a 112; G : cánula de Güedel; E : electrodos i DEA; S : shoc o descarga ; RC : reanimación cardiopulmonar; I : inspección cavidad bucal; V : ventilaciones; X : administración de oxígeno; P : comprobación de circulación (retorno); L : posición lateral de seguridad; F : orden y control. OVA** : Obertura vía aérea**.**

**CCI : Coeficiente de correlación intraclase; K: Kappa ; IC : intervalo de confianza. *sesgo de prevalencia (aplicar fórmula de Bennet (pendiente)**

Variables continuas de la prueba (excluidas maniquí): Fiabilidad intra evaluador (test-retest), entre evaluadores y concordancia entre filmaciones.

| Orden de ítems según recomendaciones | | **Respecto al Cardiff**  **Cardiff** | **ÍTEMS CONTÍNUOS** | Test-retest  (intraevaluador) | | **Entre**  **evaluadores** | | **Entre**  **filmaciones** | |
| --- | --- | --- | --- | --- | --- | --- | --- | --- | --- |
| 2000 | 12/2005 | CCI IC | | CCI IC | | **CCI IC** | |
| **T 4.3** | **T 4.3** |  | **Tiempo aviso 112 (intervalo colapso-alerta) *(item de control)* No proceda cálculo** | | | | | | |
| **X 5.5** | **X 15.3** |  | **Litres de oxigeno *(item de control)* No procede cálculo** | | | | | | |
| **S 11.1** | **H 10.1** |  | **Tiempo de 1ª descarga  *(item de control)* No procede cálculo** | | | | | | |
| **S 11.2** | **S 10.2** | **=** | **Intervalo inicio -1ª descarga** | **0,886** | **0,841-0,918** | **0,911** | **0,851-0,955** | **0,940** | **0,915-0,958** |
| **RC 18.1** | **RC11.1** | **≠** | **Tiempo inicio RCP (intervalo colapso-RCP)** | **0,875** | **0,826-0,911** | **0,865** | **0,780-0,930** | **0,903** | **0,864-0,931** |
| **RC 18.2** | **RC 11.2** |  | **2 minutos RCP escogido (guiado o no por DEA)** *(item de control)* **No procede cálculo** | | | | | | |
| **RC 21.2** | **RC12.2** | **≈** | **Compresiones peligrosas** | **0,743** | **0,648-0,815** | **0,576** | **0,405-0,750** | **0,768** | **0,680-0,834** |
| **RC 21.3** | **RC 12.3** | **≠** | **Colocación brazos incorrecta** | **0,721** | **0,617-0,800** | **0,378** | **0,201-0,605** | **0,681** | **0,565-0,770** |
| **RC 22.1** | **RC17.1** | **≈** | **Ritmo compresiones (por cada x ventilaciones)** | **0,660** | **0,502-0,808** | **0,838** | **0,774-0,885** | **0,250** | **0,070-0,414** |
| **RC 23.4** | **RC13.4** | **≠** | **Frecuencia media compresiones** | **0,892** | **0,847-0,924** | **0,771** | **0,631-0,881** | **0,853** | **0,793-0,896** |
| **P 27.3** | **RC 22.3** |  | **Tiempo retorno circulación *(item de control)* No proceda cálculo** | | | | | | |
| **P 27.4** | **RC 22.4** |  | **Intervalo inicio-terorno de circulación *(item de control)* No proceda cálculo** | | | | | | |
| **F 29.5** | **F 24.5** | **≠** | **Percepción de tiempo parado** | **0,966** | **0,947-0,978** | **0,996** | **0,988-0,999** | **0,979** | **0,967-0,986** |
| **F 29.6** | **F 24.6** | **≠** | **Percepción tiempo inicio RCP desde colapso** | **0,400** | **0,204-0,564** | **0,873** | **0,459-1,000** | **0,747** | **0,638-0,827** |
| No codificado como actividad | | | **Hora de finalización y duración de la visualización *(item de control)* No proceda cálculo** | | | | | | |

-En rojo : Test con ítems y orden según recomendaciones 12/2005. Puntuaciones bajas : se destacan ensombrecidas en la tabla.

**-La letra mayúscula** que acompaña el nº de íetm codifica **Dimensión o habilidad** (agrupación homogénea de actuaciones o ítems ) : **T: Alertar a 112;**

**X : administración de oxígeno G : cánula de Güedel; S : shoc o descarga ; RC : reanimación cardiopulmonar;; P : comprobación de circulación (retorno); F : orden y control.**

**-OVA** : Obertura vía aérea**; ≠ (diferente o nuevo) ; ≈ (modificado) ; = (igual)**

**CCI : Coeficiente de correlación intraclase; K: Kappa ; IC : intervalo de confianza.**

**La letra** que acompaña el nº de íetm codifica **Dimensión o habilidad** (agrupación homogénea de actuaciones o ítems ) : **A: aproximación segura;**

**R: respuesta (valorar conciencia); G : gritar ayuda; O: obertura vía aérea; C: comprobación inicial respiración; T Alertar a 112; G : cánula de Güedel; E : electrodos i DEA; S : shoc o descarga ; RC : reanimación cardiopulmonar; I : inspección cavidad bucal; V : ventilaciones; X : administración de oxígeno; P : comprobación de circulación (retorno); L : posición lateral de seguridad; F : orden y control. OVA** : Obertura vía aérea**.**

**CCI : Coeficiente de correlación intraclase; K: Kappa ; IC : intervalo de confianza. *sesgo de prevalencia (aplicar fórmula de Bennet (pendiente)**
